# Supplementary material for: High efficiency hysteresis-less inverted planar heterojunction perovskite solar cells with a solution-derived NiOxhole contact layer
Source: Royal Society of Chemistry journal article supplement (doi:10.1039/c5ta08193a), 2015-01-01
Supplement: c5ta08193a1.pdf [file c5ta08193a1.pdf]

## Supporting information

### **High efficiency hysteresis-less inverted planar heterojunction perovskite solar cell with NiO<sub>x</sub> hole contact layer**

*Xingtian Yin\**, *Meidan Que*, *Yonglei Xing*, *Wenxiu Que\**

**Electronic Materials Research Laboratory, International Center for Dielectric Research,  
Key Laboratory of the Ministry of Education, School of Electronic & Information  
Engineering, Xi'an Jiaotong University, Xi'an 710049, Shaanxi, People's Republic of China**

---

\* Corresponding author:

Email address: [xt\\_yin@mail.xjtu.edu.cn](mailto:xt_yin@mail.xjtu.edu.cn); [wxque@mail.xjtu.edu.cn](mailto:wxque@mail.xjtu.edu.cn)

Tel.: +86-29-83395679; Fax: +86-29-83395679

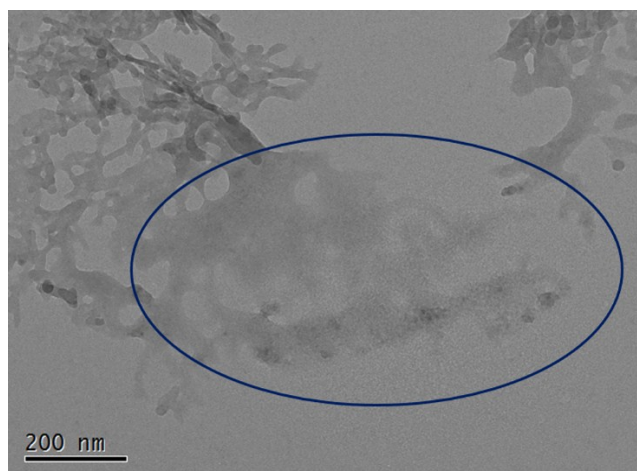

Figure S1: TEM image of the NiO<sub>x</sub> nanoparticle precursor. The area indicated by the blue circle is irradiated by electron beams during TEM characterization. Obviously, the organic components which coat the NiO<sub>x</sub> nanoparticles are destroyed by the electron beams.

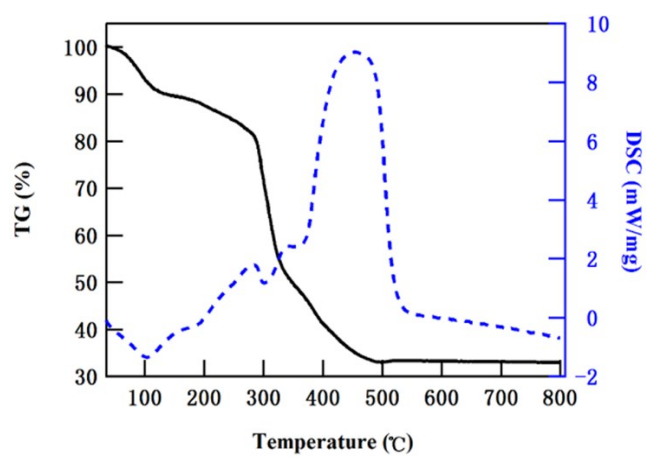

Figure S2 TGA and DSC curves of the NiO<sub>x</sub> powder obtained by drying the precursor at 150°C for 20 min.

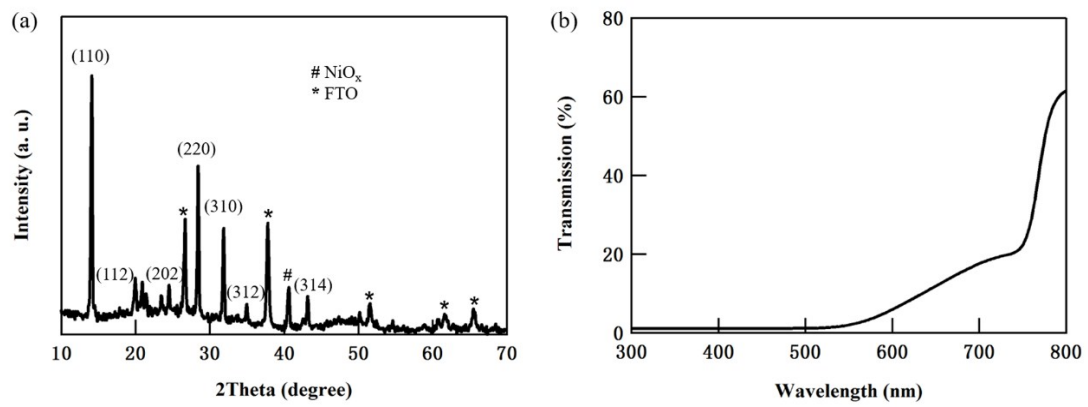

Figure S3 (a) XRD pattern (b) UV-Vis transmission spectrum of the perovskite film on the NiO<sub>x</sub> coated FTO substrate.

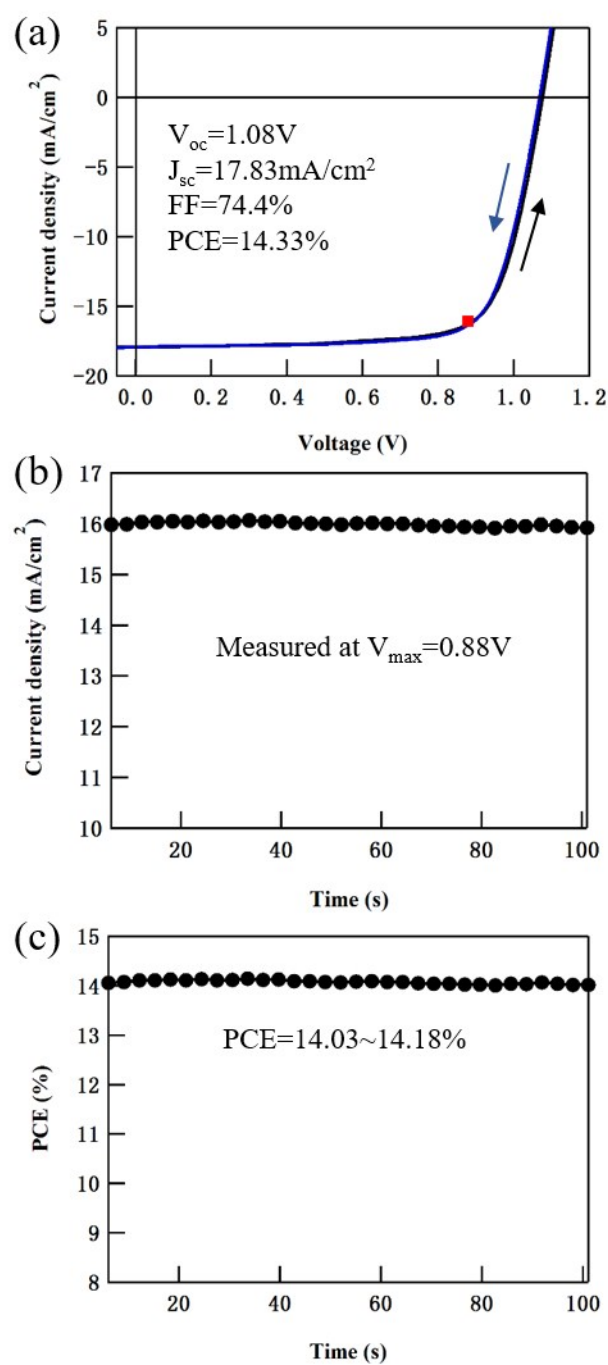

Figure S4. (a) J-V curves a device with 90 nm NiO<sub>x</sub> film. The scan directions are indicated by the arrows and the red spot represents the maximum power point obtained from the steady state power conversion efficiency measurement. (b) The current density measured at 0.88V, which is the

voltage for the maximum power point shown in a. Clearly, the current density is stable as the time increases. (c) The steady state power conversion efficiency of the device.

Table S1 Summary on the performances of the reported NiO<sub>x</sub>-based organic-inorganic hybrid perovskite solar cells and our devices are also included for comparison. The word “non” means the parameter was not presented in the paper.

| Device configuration                                                                                       | V <sub>oc</sub> (V) | J <sub>sc</sub> (mA/cm <sup>2</sup> ) | FF (%)      | PCE (%)        | Area (cm <sup>2</sup> ) | Hysteresis<br>( PCE <sub>r</sub> -PCE <sub>f</sub>  ) % | Reference        |
|------------------------------------------------------------------------------------------------------------|---------------------|---------------------------------------|-------------|----------------|-------------------------|---------------------------------------------------------|------------------|
| ITO/PLD-NiO/CH <sub>3</sub> NH <sub>3</sub> PbI <sub>3</sub> /PCBM/LiF/Al                                  | 1.06                | 20.2                                  | 0.813       | 17.3           | Non                     | Non                                                     | 1                |
| FTO/Cu:NiO/CH <sub>3</sub> NH <sub>3</sub> PbI <sub>3</sub> /PCBM/Ag                                       | 1.11±0.01           | 18.75±0.42                            | 0.72±0.01   | 15.40±0.3<br>3 | Non                     | obvious                                                 | 2                |
| FTO/TiO <sub>2</sub> /ZrO <sub>2</sub> /NiO/carbon-(CH <sub>3</sub> NH <sub>3</sub> PbI <sub>3</sub> )     | 0.917               | 21.36                                 | 0.76        | 14.9           | Non                     | Non                                                     | 3                |
| <b>FTO/NiO<sub>x</sub>/CH<sub>3</sub>NH<sub>3</sub>PbI<sub>3</sub>/PCBM/Ag</b>                             | <b>1.09</b>         | <b>17.93</b>                          | <b>73.8</b> | <b>14.42</b>   | <b>0.07</b>             | <b>0.06</b>                                             | <b>This work</b> |
| FTO/NiO/Meso-Al <sub>2</sub> O <sub>3</sub> /CH <sub>3</sub> NH <sub>3</sub> PbI <sub>3</sub> /PCBM/BCP/Ag | 1.04                | 18.0                                  | 72          | 13.5           | 0.09                    | 0.66                                                    | 4                |
| ITO/ NiO/meso-NiO/CH <sub>3</sub> NH <sub>3</sub> PbI <sub>3</sub> /BCP/Al                                 | 0.96                | 19.8                                  | 61          | 11.6           | Non                     | Non                                                     | 5                |
| FTO/ NiO NCs/CH <sub>3</sub> NH <sub>3</sub> PbCl <sub>3-x</sub> I <sub>x</sub> /PCBM (1.5 wt% PS)/Al      | 1.07                | 15.62                                 | 0.64        | 10.68          | Non                     | Obvious                                                 | 6                |
| FTO/NiO/CH <sub>3</sub> NH <sub>3</sub> PbI <sub>3</sub> /PCBM/Ag                                          | 1.10                | 15.17                                 | 0.59        | 9.84           | Non                     | Non                                                     | 7                |
| FTO/NiO NCs/CH <sub>3</sub> NH <sub>3</sub> PbI <sub>3</sub> /PCBM/Au                                      | 0.882               | 16.27                                 | 63.5        | 9.11           | Non                     | Non                                                     | 8                |
| ITO/NiO/meso-NiO/CH <sub>3</sub> NH <sub>3</sub> PbI <sub>3</sub> /BCP/Al                                  | 1.04                | 13.24                                 | 69          | 9.51           | 0.06                    | Non                                                     | 9                |
| ITO/NiO/CH <sub>3</sub> NH <sub>3</sub> PbI <sub>3-x</sub> Cl <sub>x</sub> /PCBM/BCP/Al                    | 0.92                | 12.43                                 | 68          | 7.8            | 0.06                    | Non                                                     | 10               |
| ITO/NiO/CH <sub>3</sub> NH <sub>3</sub> PbI <sub>3</sub> /PCBM/Al                                          | 1.05                | 15.4                                  | 48          | 7.6            | 0.0725                  | Non                                                     | 11               |
| ITO/NiO/CH <sub>3</sub> NH <sub>3</sub> PbI <sub>3</sub> /PCBM/BCP/Al                                      | 0.901               | 13.16                                 | 65.38       | 7.75           | 0.06                    | Non                                                     | 12               |
| FTO/NiO /CH <sub>3</sub> NH <sub>3</sub> PbI <sub>3-x</sub> Cl <sub>x</sub> /PCBM/Ag                       | 0.786               | 14.2                                  | 0.65        | 7.26           | 0.07                    | Non                                                     | 13               |

1. J. H. Park, J. Seo, S. Park, S. S. Shin, Y. C. Kim, N. J. Jeon, H.-W. Shin, T. K. Ahn, J. H. Noh, S. C. Yoon, C. S. Hwang, S. I. Seok, *Adv. Mater.*, 2015, **27**, 4013-4019.
2. J. H. Kim, P.-W. Liang, S. T. Williams, N. Cho, C.-C. Chueh, M. S. Glaz, D. S. Ginger, A. K. Y. Jen, *Adv. Mater.*, 2014, 695-701.
3. X. Xu, Z. Liu, Z. Zuo, M. Zhang, Z. Zhao, Y. Shen, H. Zhou, Q. Chen, Y. Yang, M. Wang, *Nano Lett.*, 2015, **15**, 2402-2408.
4. W. Chen, Y. Z. Wu, J. Liu, C. J. Qin, X. D. Yang, A. Islam, Y. B. Cheng, L. Y. Han, *Energy Environ. Sci.*, 2015, **8**, 629-640.
5. K. C. Wang, P. S. Shen, M. H. Li, S. Chen, M. W. Lin, P. Chen, T. F. Guo, *ACS Appl. Mater. Interfaces*, 2014, **6**, 11851-11858.
6. Y. Bai, H. Yu, Z. L. Zhu, K. Jiang, T. Zhang, N. Zhao, S. H. Yang, H. Yan, *J. Mater. Chem. A*, 2015, **3**, 9098-9102.
7. J. Cui, F. P. Meng, H. Zhang, K. Cao, H. L. Yuan, Y. B. Cheng, F. Huang, M. K. Wang, *ACS Appl. Mater. Interfaces*, 2014, **6**, 22862-22870.
8. Z. Zhu, Y. Bai, T. Zhang, Z. Liu, X. Long, Z. Wei, Z. Wang, L. Zhang, J. Wang, F. Yan, S. Yang, *Angew. Chem. Int. Ed.*, 2014, **53**, 12571-12575.
9. K. C. Wang, J. Y. Jeng, P. S. Shen, Y. C. Chang, E. W. G. Diau, C. H. Tsai, T. Y. Chao, H. C. Hsu, P. Y. Lin, P. Chen, T. F. Guo, T. C. Wen, *Sci Rep*, 2014, **4**, 8.
10. J.-Y. Jeng, K.-C. Chen, T.-Y. Chiang, P.-Y. Lin, T.-D. Tsai, Y.-C. Chang, T.-F. Guo, P. Chen, T.-C. Wen, Y.-J. Hsu, *Adv. Mater.*, 2014, **26**, 4107-4113.
11. L. Hu, J. Peng, W. Wang, Z. Xia, J. Yuan, J. Lu, X. Huang, W. Ma, H. Song, W. Chen, Y.-B. Cheng, J. Tang, *ACS Photonics*, 2014, **1**, 547-553.
12. L. Wei-Chih, L. Kun-Wei, G. Tzung-Fang, L. Jung, *IEEE Trans. Electron Devices*, 2015, **62**, 1590-1595.
13. A. S. Subbiah, A. Halder, S. Ghosh, N. Mahuli, G. Hodes, S. K. Sarkar, *J. Phys. Chem. Lett.*, 2014, **5**, 1748-1753.



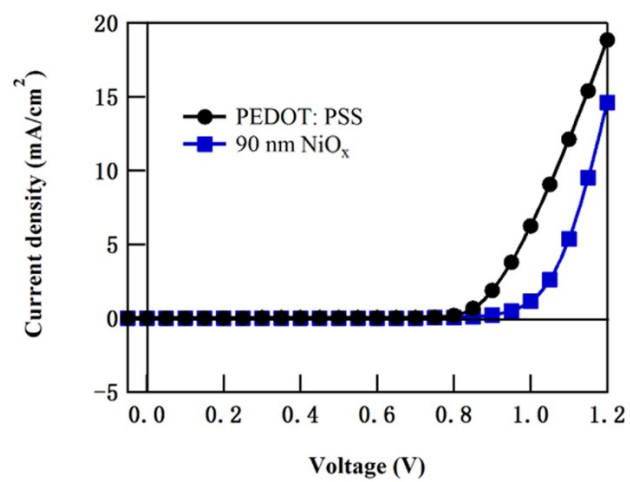

Figure S5 J-V curves for the perovskite solar cells based on the PEDOT:PSS contact and 90 nm NiO<sub>x</sub> contact.

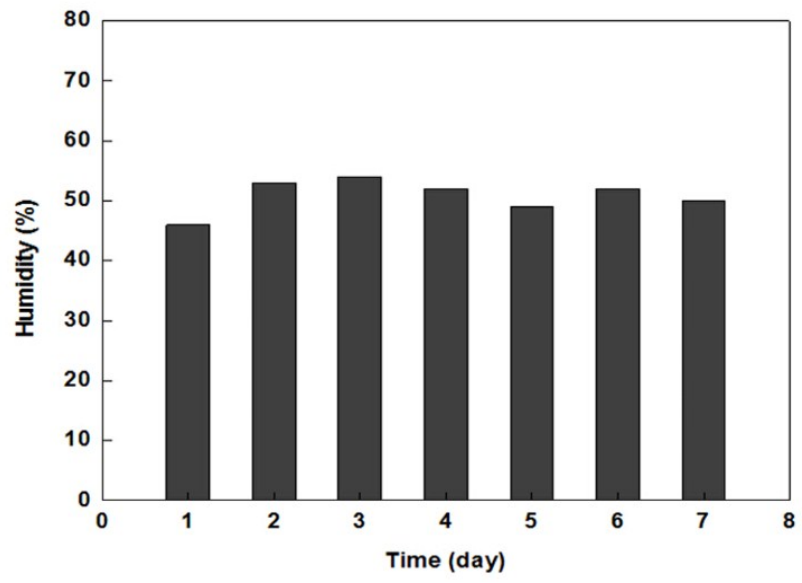

Figure S6 Ambient air humidity for the stability study.
